# Supplementary material for: Pharmacokinetics and Changes in Lipid Mediator Profiling after Consumption of Specialized Pro-Resolving Lipid-Mediator-Enriched Marine Oil in Healthy Subjects
Source: MDPI journal article supplement (doi:10.3390/ijms242216143), 2023-11-09
Supplement: s1 [file s1]

[illegible]

| AA metabolome     |                    |                    |                    |                    |                    |                    |                   |                     |                      |                   |                    |                   |
|-------------------|--------------------|--------------------|--------------------|--------------------|--------------------|--------------------|-------------------|---------------------|----------------------|-------------------|--------------------|-------------------|
| AA                | 66.9(57.2-78.1)    | 67.8(61.4-84.1)    | 72.0(63.3-79.1)    | 68.9(62.9-76.6)    | 60.3(55.5-70.9)    | 70.7(59.0-81.9)    | 76.2(69.3-89.2)   | 73.2(65.1-75.2)     | 76.4(68.9-89.0)      | 70.3(66.9-78.0)   | 67.2(62.1-80.1)    | 76.7(70.8-84.7)   |
| LXA <sub>4</sub>  | 0.6(0.0-1.3)       | 1.7(0.0-2.3)       | 0.8(0.2-1.3)       | 0.8(0.1-1.3)       | 0.4(0.0-0.9)       | 0.3(0.0-1.2)       | 0.6(0.0-1.7)      | 1.7(0.2-2.8)        | 1.7(0.3-2.1)         | 1.8(0.2-2.5)      | 0.8(0.1-1.6)       | 0.8(0.0-1.4)      |
| LXB <sub>4</sub>  | 0.0(0.0-0.0)       | 0.0(0.0-0.0)       | 0.0(0.0-0.0)       | 0.0(0.0-0.0)       | 0.0(0.0-0.0)       | 0.0(0.0-0.0)       | 0.0(0.0-0.0)      | 0.0(0.0-0.0)        | 0.0(0.0-0.0)         | 0.0(0.0-4.7)      | 0.0(0.0-0.0)       | 0.0(0.0-0.0)      |
| LTB <sub>4</sub>  | 77.0(45.6-109.6)   | 98.5(72.0-141.3)   | 90.9(38.1-141.5)   | 120.7(66.4-156.1)* | 94.9(47.8-120.0)   | 142.3(75.5-185.1)* | 84.9(30.8-97.0)   | 111.7(49.4-123.4)   | 88.9(43.4-125.6)     | 69.7(52.1-118.6)  | 106.7(89.4-155.1)  | 75.8(65.2-151.3)* |
| PGD <sub>2</sub>  | 4.2(3.0-8.1)       | 6.3(2.8-9.6)       | 4.6(3.3-4.9)       | 3.9(3.2-11.1)      | 4.5(3.1-5.2)       | 4.8(3.2-6.5)       | 3.5(3.3-6.0)      | 3.7(2.3-6.2)        | 4.2(2.8-6.7)         | 3.1(2.4-4.4)      | 3.8(2.7-5.3)       | 3.3(2.6-4.9)      |
| PGE <sub>2</sub>  | 29.9(22.8-36.9)    | 34.1(20.2-56.1)    | 27.2(21.0-33.3)    | 28.8(22.2-39.9)    | 20.7(16.7-23.3)*   | 25.1(22.1-35.7)    | 14.6(11.9-15.3)   | 27.9(20.3-36.8)**   | 30.0(24.9-44.0)*     | 24.2(17.0-25.2)   | 18.6(12.5-38.6)    | 19.7(15.7-24.2)   |
| PGF <sub>2α</sub> | 15.3(13.9-17.9)    | 22.0(17.7-35.9)    | 18.4(14.3-20.1)    | 20.1(13.4-23.9)    | 16.7(14.9-22.1)    | 14.9(13.5-17.0)    | 16.5(13.7-22.2)   | 19.9(14.0-22.9)     | 16.8(12.3-18.0)      | 15.3(14.3-17.5)   | 17.4(15.0-25.0)    | 15.4(11.2-18.6)   |
| TXB <sub>2</sub>  | 362.0(212.6-482.6) | 422.8(190.0-831.3) | 299.8(220.8-417.5) | 349.0(166.0-664.6) | 272.3(164.5-387.8) | 234.7(139.5-270.9) | 158.1(74.3-247.6) | 297.2(207.6-388.4)* | 177.6(100.6-232.3)   | 125.4(63.6-228.3) | 163.0(122.9-288.8) | 154.3(78.2-177.4) |
| DPA metabolome    |                    |                    |                    |                    |                    |                    |                   |                     |                      |                   |                    |                   |
| DPA               | 50.1(42.5-62.8)    | 39.4(25.5-48.8)    | 64.0(42.4-95.7)    | 34.4(26.1-45.3)*   | 22.5(16.7-30.2)*   | 59.7(34.5-65.8)    | 42.9(36.1-51.7)   | 98.2(68.5-167.3)**  | 180.2(124.7-205.4)** | 59.7(41.1-82.9)*  | 41.1(27.1-68.0)    | 58.3(45.0-82.4)*  |

Values are expressed as median (interquartile range) Concentrations are expressed in pg/ml, except for free fatty acids (DHA, EPA, AA, DPA) and their monohydroxylated metabolites (18-HEPE, 14-HDHA and 17-HDHA) that are expressed in ng/ml. Statistical significance, relative to time 0, within each situation as determined by by Wilcoxon Signed Rank test (\* $p<0.05$ ; \*\* $p<0.01$ )

**Table S2.** Serum concentrations of free fatty acids and lipid mediators' metabolomes.

|                       | Control (water dosing) |                  |                   |                 |                  |                   | Enriched-SPM marine oil supplementation |                     |                      |                    |                     |                      |
|-----------------------|------------------------|------------------|-------------------|-----------------|------------------|-------------------|-----------------------------------------|---------------------|----------------------|--------------------|---------------------|----------------------|
|                       | 0 hours                | 3 hours          | 6 hours           | 9 hours         | 12 hours         | 24 hours          | 0 hours                                 | 3 hours             | 6 hours              | 9 hours            | 12 hours            | 24 hours             |
| <b>DHA metabolome</b> |                        |                  |                   |                 |                  |                   |                                         |                     |                      |                    |                     |                      |
| DHA                   | 76.0(58.3-87.7)        | 59.7(55.6-64.4)  | 82.0(71.8-104.9)  | 70.2(61.3-93.9) | 56.7(43.5-63.1)  | 69.0(43.9-83.2)   | 68.5(55.9-72.7)                         | 55.0(52.0-61.5)     | 65.0(40.3-86.8)      | 59.7(47.5-77.2)    | 64.3(55.4-72.2)     | 64.6(57.7-82.1)      |
| 14-HDHA               | 109.3(76.4-134.1)      | 82.4(69.5-102.2) | 118.9(80.3-156.0) | 72.8(68.0-99.2) | 56.2(51.3-82.5)* | 109.4(81.4-126.6) | 102.1(72.8-137.1)                       | 175.2(123.2-209.1)  | 219.7(180.7-268.7)** | 103.1(83.5-120.0)  | 102.6(81.2-126.1)   | 126.0(90.3-150.9)    |
| 17-HDHA               | 16.4(9.9-21.2)         | 10.4(9.2-16.6)   | 17.9(10.1-22.0)   | 11.9(8.0-14.8)  | 8.3(7.2-11.0)**  | 16.4(13.5-18.9)   | 13.3(10.4-27.0)                         | 44.7(26.3-58.3)     | 60.5(46.4-112.6)**   | 16.5(11.9-20.0)    | 17.0(9.7-23.9)      | 20.2(13.7-24.0)      |
| RvD1                  | 0.0(0.0-0.0)           | 0.0(0.0-0.0)     | 0.0(0.0-0.0)      | 0.0(0.0-0.0)    | 0.0(0.0-0.0)     | 0.0(0.0-0.0)      | 0.0(0.0-0.0)                            | 0.0(0.0-0.0)        | 0.0(0.0-3.6)         | 0.0(0.0-0.0)       | 0.0(0.0-0.0)        | 0.0(0.0-2.5)         |
| RvD2                  | 3.4(0.5-4.4)           | 2.9(1.8-3.9)     | 2.0(0.0-4.2)      | 0.0(0.0-2.2)    | 0.8(0.0-2.6)     | 0.0(0.0-0.9)      | 0.0(0.0-2.9)                            | 0.0(0.0-1.0)        | 3.2(0.0-4.3)         | 3.5(1.9-4.6)       | 1.8(0.0-3.1)        | 2.6(0.5-3.7)         |
| RvD3                  | 0.0(0.0-0.0)           | 0.0(0.0-2.3)     | 0.0(0.0-1.6)      | 0.0(0.0-0.0)    | 0.0(0.0-0.0)     | 0.0(0.0-1.5)      | 0.0(0.0-0.0)                            | 0.0(0.0-3.7)        | 0.0(0.0-0.0)         | 0.0(0.0-0.0)       | 0.0(0.0-1.4)        | 0.0(0.0-1.4)         |
| RvD4                  | 0.0(0.0-0.0)           | 0.0(0.0-0.0)     | 0.0(0.0-0.0)      | 0.0(0.0-0.0)    | 0.0(0.0-0.0)     | 0.0(0.0-0.0)      | 0.0(0.0-0.0)                            | 0.0(0.0-1.9)        | 0.0(0.0-0.0)         | 0.0(0.0-0.0)       | 0.0(0.0-0.0)        | 0.0(0.0-0.0)         |
| RvD5                  | 48.2(27.3-77.0)        | 39.4(30.5-50.3)  | 48.2(33.0-71.9)   | 38.8(35.4-43.0) | 33.3(26.9-61.5)  | 53.8(35.6-72.5)   | 64.5(32.3-90.7)                         | 234.3(130.7-312.4)* | 240.0(130.0-488.5)** | 72.3(48.8-112.6)   | 60.9(47.2-111.9)    | 79.5(70.6-88.2)      |
| PDX                   | 56.9(49.1-87.1)        | 52.7(48.3-82.4)  | 58.3(47.0-122.5)  | 52.9(37.3-94.1) | 41.9(31.9-75.0)* | 79.9(39.4-104.5)  | 65.4(43.2-92.7)                         | 122.2(81.4-155.3)   | 188.9(96.3-210.9)*   | 63.3(49.6-106.4)   | 61.7(49.2-131.6)    | 79.2(62.3-130.7)     |
| PD1                   | 7.5(5.9-11.2)          | 7.8(5.1-11.8)    | 5.1(2.4-9.8)      | 5.8(2.5-8.9)    | 3.7(2.2-6.3)*    | 5.6(0.7-7.9)      | 8.3(6.2-10.3)                           | 13.3(9.3-19.7)**    | 12.8(5.9-24.3)       | 9.0(7.3-11.6)      | 6.1(4.9-12.5)       | 6.4(5.6-10.7)        |
| MaR1                  | 7.9(0.0-12.5)          | 18.4(11.9-20.7)* | 11.7(0.0-38.1)    | 18.9(8.4-31.1)* | 12.9(3.1-17.4)   | 2.9(0.0-13.7)     | 13.8(3.1-16.3)                          | 22.7(9.2-65.1)      | 12.5(0.0-53.4)       | 17.8(0.0-21.8)     | 19.4(10.6-33.3)     | 10.9(0.0-20.6)       |
| MaR2                  | 52.1(33.9-71.8)        | 36.1(34.3-70.2)  | 55.2(33.9-87.9)   | 37.1(29.3-48.5) | 30.2(16.4-58.4)  | 55.4(33.3-79.8)   | 47.8(23.6-125.5)                        | 166.9(137.8-235.1)  | 226.3(137.9-390.5)*  | 47.7(40.2-76.3)    | 54.9(38.0-127.2)    | 68.3(49.2-84.0)      |
| <b>EPA metabolome</b> |                        |                  |                   |                 |                  |                   |                                         |                     |                      |                    |                     |                      |
| EPA                   | 78.6 (62.7-87.9)       | 82.0(67.1-87.0)  | 80.6(71.4-99.4)   | 84.0(55.5-95.1) | 64.3(54.8-79.1)  | 61.6(45.8-84.1)   | 69.3(61.0-78.1)                         | 99.1(86.1-115.9)*   | 134.7(99.4-155.7)**  | 109.2(97.0-139.2)* | 116.0(103.0-123.7)* | 116.2(112.0-121.2)** |
| 18-HEPE               | 3.4(2.6-6.3)           | 2.6(2.1-5.9)     | 3.8(2.6-5.3)      | 3.2(1.7-5.4)    | 2.2(1.9-4.1)*    | 3.4(2.6-5.0)      | 3.4(2.3-6.4)                            | 37.7(20.7-58.3)*    | 31.6(24.9-60.5)**    | 9.6(8.2-13.8)      | 10.4(6.5-14.3)      | 10.1(5.7-17.5)       |
| RvE1                  | 0.0(0.0-0.0)           | 0.0(0.0-0.0)     | 0.0(0.0-0.0)      | 0.0(0.0-0.0)    | 0.0(0.0-9.3)     | 0.0(0.0-0.0)      | 0.0(0.0-0.0)                            | 0.0(0.0-37.3)       | 0.0(0.0-0.0)         | 0.0(0.0-0.0)       | 0.0(0.0-0.0)        | 0.0(0.0-27.9)        |

| AA metabolome     |                          |                          |                          |                          |                          |                          |                          |                          |                          |                          |                          |                          |
|-------------------|--------------------------|--------------------------|--------------------------|--------------------------|--------------------------|--------------------------|--------------------------|--------------------------|--------------------------|--------------------------|--------------------------|--------------------------|
| AA                | 101.8(88.6-125.4)        | 89.2(83.9-115.7)         | 126.6(81.4-140.6)        | 102.4(83.3-134.4)        | 87.7(81.0-105.9)         | 101.0(70.9-130.4)        | 105.1(96.5-116.2)        | 100.7(83.5-118.3)        | 105.4(85.0-128.9)        | 109.1(79.7-127.7)        | 94.9(87.1-103.4)         | 99.2(88.2-108.2)         |
| LXA <sub>4</sub>  | 1.3(1.0-3.3)             | 0.8(0.0-2.1)             | 1.3(0.0-1.7)             | 0.4(0.0-1.4)             | 1.7(0.9-2.2)             | 1.3(0.2-2.6)             | 1.8(1.1-3.1)             | 2.2(0.4-2.7)             | 1.9(0.4-3.1)             | 0.0(0.0-1.6)*            | 0.5(0.0-1.2)*            | 2.0(0.0-2.8)             |
| LXB <sub>4</sub>  | 4.3(0.0-15.3)            | 0.0(0.08.2)              | 0.0(0.0-0.0)             | 0.0(0.0-0.0)             | 0.0(0.0-0.0)             | 0.0(0.0-3.3)             | 0.0(0.0-3.9)             | 0.0(0.0-0.0)             | 0.0(0.0-0.0)             | 0.0(0.0-26.2)            | 0.0(0.0-6.0)             | 2.0(0.0-7.5)             |
| LTB <sub>4</sub>  | 526.7(211.3-680.6)       | 379.8(326.3-575.2)       | 391.5(268.6-598.6)       | 267.1(217.6-360.6)       | 311.2(190.2-572.1)       | 330.0(239.0-493.7)       | 406.0(245.8-471.8)       | 428.9(267.3-574.5)       | 507.8(297.9-719.2)       | 285.6(177.9-414.9)       | 401.3(226.9-541.1)       | 474.1(289.1-591.9)       |
| PGD <sub>2</sub>  | 101.4(67.8-160.3)        | 109.4(67.9-172.1)        | 137.4(101.4-183.8)       | 125.0(85.8-205.5)        | 120.7(88.8-159.4)        | 118.9(79.6-413.2)        | 146.2(82.5-178.1)        | 122.5(86.5-183.5)        | 90.5(62.7-139.8)*        | 70.5(44.8-184.4)         | 124.9(66.1-231.2)        | 86.6(71.1-145.2)         |
| PGE <sub>2</sub>  | 17108.2(14972.2-33569.9) | 23277.6(4963.2-34259.5)  | 23348.0(20979.7-31014.1) | 20607.8(6011.2-43767.4)  | 19912.2(14690.2-31520.3) | 16471.9(7613.6-51855.3)  | 27618.9(8779.9-37633.9)  | 24636.2(8194.4-40735.9)  | 18231.1(5721.1-25935.5)  | 15037.9(2624.0-37589.6)  | 19513.7(3637.4-35650.0)  | 19594.4(2631.4-26698.8)  |
| PGF <sub>2α</sub> | 3827.7(2754.4-4001.4)    | 3249.5(1963.8-4360.4)    | 4545.5(3588.5-4806.8)    | 4199.8(2933.9-6610.5)    | 4000.6(2765.7-5034.1)    | 3740.5(2234.1-8736.8)    | 4377.2(3210.0-5496.6)    | 3732.9(2716.5-4897.4)    | 3274.1(2613.5-4359.4)    | 2979.8(2162.5-5065.5)    | 4011.4(2316.6-4445.1)    | 3315.2(2874.6-3957.2)    |
| TXB <sub>2</sub>  | 19806.9(14400.2-27760.3) | 27790.8(15922.1-31180.3) | 38756.6(27045.2-47334.9) | 24570.9(19173.9-32018.1) | 29234.7(19041.8-42877.4) | 32345.3(20572.8-46941.2) | 27305.0(22935.3-40094.5) | 29370.3(21000.7-32753.6) | 28810.5(22468.0-43069.4) | 26064.5(20533.9-36773.9) | 24540.2(12355.5-30008.4) | 29810.3(19209.5-36860.6) |
| DPA metabolome    |                          |                          |                          |                          |                          |                          |                          |                          |                          |                          |                          |                          |
| DPA               | 59.0(38.4-70.1)          | 40.0(35.3-49.6)          | 72.5(55.5-78.2)          | 38.6(34.3-49.5)          | 49.4(39.7-62.8)          | 51.8(42.9-71.3)          | 51.9(47.9-61.5)          | 125.8(82.0-147.5)*       | 132.2(124.7-199.3)**     | 64.4(57.4-80.6)          | 61.3(55.7-68.3)          | 65.9(55.7-81.8)          |

Values are expressed as median (interquartile range). Concentrations are expressed in pg/ml, except for free fatty acids (DHA, EPA, AA, DPA and their monohydroxylated metabolites (18-HEPE, 14-HDHA and 17-HDHA) that are expressed in ng/ml. Statistical significance, relative to time 0, within each situation as determined by by Wilcoxon Signed Rank test (\* $p<0.05$ ; \*\* $p<0.01$ ).
